# THE AMERICAN JOURNAL OF PSYCHIATRY

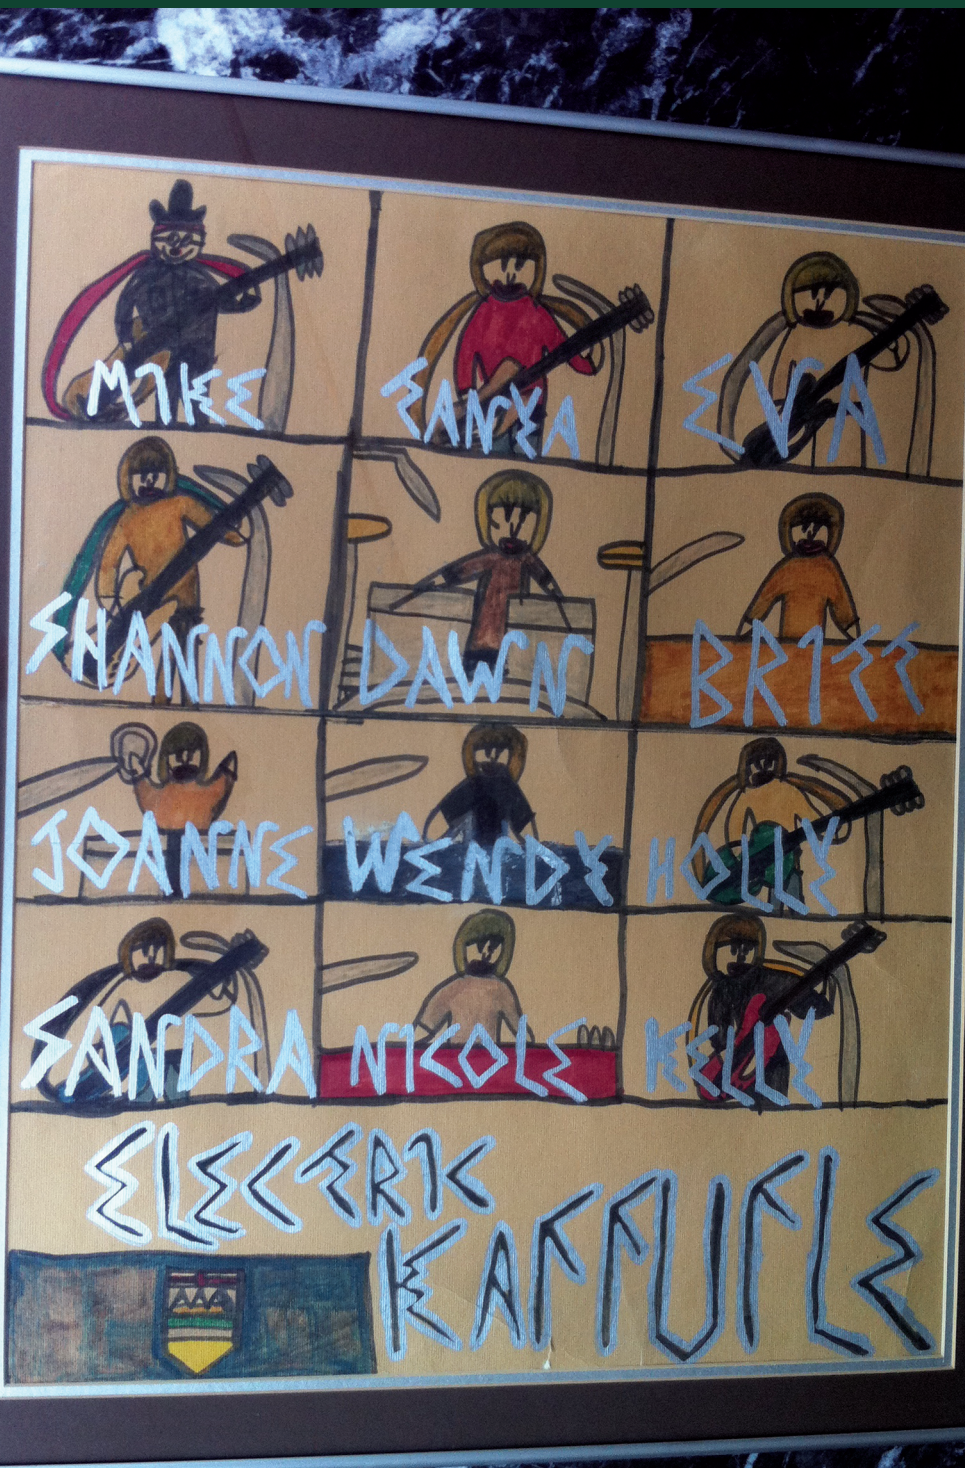

- ◀ Application of DSM-5 Criteria for Autism Spectrum Disorder to Three Samples of Children With DSM-IV Diagnoses of Pervasive Developmental Disorders  
Marisela Huerta, Ph.D., et al. 1056
- Antidepressant Response in Patients With Major Depression Exposed to NSAIDs  
Patience J. Gallagher, B.S., et al. 1065
- Decline in Genetic Influence on the Co-Occurrence of Alcohol, Marijuana, and Nicotine Dependence Symptoms From Age 14 to 29  
Scott I. Vrieze, M.A., et al. 1073
- Deficits in Transcriptional Regulators of Cortical Parvalbumin Neurons in Schizophrenia  
David W. Volk, M.D., Ph.D., et al. 1082
- Continuing Medical Education 1123

October 2012

Volume 169 • Number 10

Official Journal of the  
AMERICAN PSYCHIATRIC ASSOCIATION

[ajp.psychiatryonline.org](http://ajp.psychiatryonline.org)
