# The American Journal of PSYCHIATRY

Latest  
IMPACT  
FACTOR  
12.539!

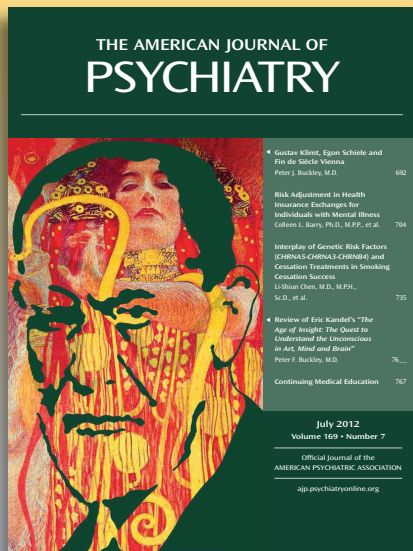

Official Journal of the  
American Psychiatric Association

Edited by Robert Freedman, M.D.

- The *American Journal of Psychiatry* has an Impact Factor of 12.539 according to the recently released 2011 Journal Citation Reports® (Thomson Reuters, 2012), placing it 2nd among the 129 journals in psychiatry while still remaining the far-and-away leader in total citations.

- The *American Journal of Psychiatry* (AJP) is also the #2 journal in psychiatry in terms of immediacy according to Thomson Scientific's Immediacy Index. This important performance metric is calculated by dividing the number of citations

to articles published in a given year by the number of articles published in that year.

- The Immediacy Index is a good measure of how quickly a given journal's articles are cited. AJP's #2 placement is a result of publishing articles that are relevant, covering current "hot" topics and cutting-edge research, and getting these findings to the field faster with AJP in Advance, the Journal's online-ahead-of-print publication protocol.

- A recent poll conducted by the BioMedical & Life Sciences Division of The Special Libraries Association identified the 100 most influential journals in all of Biology & Medicine over the last 100 years. *The American Journal of Psychiatry* was among those honored, the only psychiatry/psychology journal represented.

No other psychiatric journal reaches more psychiatrists with greater impact or immediacy than the one the overwhelming majority of psychiatrists considers essential: AJP.

ISSN 0002-953X • [ajp.psychiatryonline.org](http://ajp.psychiatryonline.org)

To order a subscription, visit [www.appi.org](http://www.appi.org).

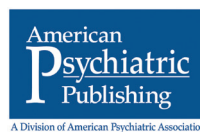

The *First* and *Last* Word in Psychiatry

[www.appi.org](http://www.appi.org) • 1-800-368-5777 • 703-907-7322

Find us on [facebook](#) and [twitter](#) Priority Code AH1246

# THE AMERICAN PSYCHIATRIC ASSOCIATION

1000 Wilson Blvd., Suite 1825, Arlington, VA 22209-3901  
(888) 357-7924 (toll-free inside the U.S. and Canada) / (703) 907-7300  
web site: [www.psych.org/](http://www.psych.org/) e-mail: [apa@psych.org](mailto:apa@psych.org)

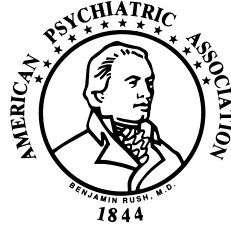

## OFFICERS 2012–2013

|                 |                            |
|-----------------|----------------------------|
| President       | Dilip V. Jeste, M.D.       |
| President-Elect | Jeffrey A. Lieberman, M.D. |
| Treasurer       | David Fassler, M.D.        |
| Secretary       | Roger Peele, M.D.          |

## ASSEMBLY

|               |                        |
|---------------|------------------------|
| Speaker       | R. Scott Benson, M.D.  |
| Speaker-Elect | Melinda L. Young, M.D. |
| Recorder      | Jenny L. Boyer, M.D.   |

## MEDICAL DIRECTOR'S OFFICE

|                          |                            |
|--------------------------|----------------------------|
| Medical Director and CEO | James H. Scully, Jr., M.D. |
|--------------------------|----------------------------|

## BOARD OF TRUSTEES

|                          |                            |
|--------------------------|----------------------------|
| Jeffrey Akaka, M.D.      | Judith F. Kashtan, M.D.    |
| Carol A. Bernstein, M.D. | Molly K. McVoy, M.D.       |
| Brian Crowley, M.D.      | James E. Ninninger, M.D.   |
| Jeffrey Geller, M.D.     | John M. Oldham, M.D.       |
| Marc David Graff, M.D.   | Alan F. Schatzberg, M.D.   |
| James A. Greene, M.D.    | Alik S. Widge, M.D., Ph.D. |

## PUBLISHER

Rebecca D. Rinehart

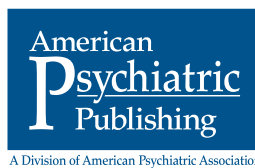

The American Journal of Psychiatry is online at [ajp.psychiatryonline.org](http://ajp.psychiatryonline.org)

# THE AMERICAN PSYCHIATRIC ASSOCIATION

## Chairpersons of Councils, Commissions, Committees, and Task Forces

### Standing Committees

---

**Bylaws**

Eric M. Plakun, M.D.

**Elections**

Robert E. Kelly, Jr., M.D.

**Ethics**

Richard D. Milone, M.D.

**Finance and Budget**

Frank W. Brown, M.D.

**Audit**

David Fassler, M.D.

**Investment Oversight**

Larry R. Faulkner, M.D.

**Joint Reference**

Jeffrey A. Lieberman, M.D.

**Membership**

Joseph Ezra V. Rubin, M.D.

**Nominating**

John M. Oldham, M.D.

**Tellers**

Tanya Nayyirah Alim, M.D.

### Council on Addiction Psychiatry

---

John A. Renner, M.D.

### Council on Advocacy and Government Relations

---

Robert Paul Cabaj, M.D.

**Advocacy and Litigation Funding**

Renee L. Binder, M.D.

### Council on Children, Adolescents, and Their Families

---

Louis J. Kraus, M.D.

**Agnes Purcell McGavin Award****Blanche F. Ittleson Research Award**

Karen Dineen Wagner, M.D.

### Council on Communications

---

Jeffrey A. Borenstein, M.D.

### Council on Geriatric Psychiatry

---

Brent P. Forester, M.D.

### Council on Healthcare Systems and Financing

---

Sul Ross Olen Thorward, M.D.

**Reimbursement for Psychiatric Care**

Bruce J. Schwartz, M.D.

**RBRVS, Codes and Reimbursement**

Ronald M. Burd, M.D.

### Council on Medical Education and Lifelong Learning

---

Sandra Sexson, M.D.

**APA Public Psychiatry Fellowship Selection Committee**

Stephen M. Goldfinger, M.D.

**APA/SAMHSA Minority Fellowship Selection and Advisory**

Toi B. Harris, M.D.

**Scientific Program**

Joseph A. Cheong, M.D.

**Scientific Program Committee of the Institute on Psychiatric Services**

David Alan Pollack, M.D.

**Task Force to Update the Ethics Annotations**

Laura W. Roberts, M.D.

**Vestermark Award Committee**

Frederick G. Guggenheim, M.D.

### Council on Minority Health and Health Disparities

---

Sandra C. Walker, M.D.

### Council on Psychiatry And Law

---

Patricia R. Recupero, M.D., J.D.

**Isaac Ray/Human Rights Award**

Steven K. Hoge, M.D.

**Judicial Action**

Paul S. Appelbaum, M.D.

**Manfred S. Guttmacher Award**

Rebecca W. Brendel, M.D., J.D.

### Council on Psychosomatic Medicine (Consultation Liaison Psychiatry)

---

Joel E. Dimsdale, M.D.

### Council on Research and Quality Care

---

Joel Yager, M.D.

**Electronic Health Records**

Steven Roy Daviss, M.D.

**Psychiatric Dimensions of Disasters**

Robert J. Ursano, M.D.

**Research Awards**

Lewis L. Judd, M.D.

**Steering Committee on Practice Guidelines**

Joel Yager, M.D.

**Task Force on DSM-V**

David J. Kupfer, M.D.

**Task Force to Revise the Practice of Electroconvulsive Therapy**

Sarah H. Lisanby, M.D.

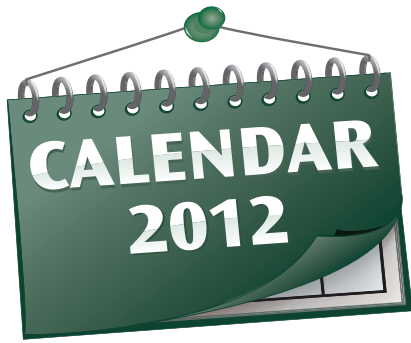

For free listing of your organization's official annual or regional meeting, please send us the following information: sponsor, location, inclusive dates, type and number of continuing education credits (if available), and the name, address, and telephone number of the person or group to contact for more information. In order for an event to appear in our listing, all notices and changes must be received at least 6 months in advance of the meeting and should be addressed to:

**Calendar, American Journal of Psychiatry, 1000 Wilson Boulevard, Suite 1825, Arlington, VA 22209-3901, [swestrade@psych.org](mailto:swestrade@psych.org) (e-mail).**

Because of space limitations, only listings of meetings of the greatest interest to Journal readers may be included.

---

## OCTOBER

**October 3–5**, International Biennial Congress of the Marcé Society (International Society for the Understanding, Prevention and Treatment of Mental Illness Related to Child-bearing), in collaboration with the Société Marcé Francophone, Paris, France (conducted in English). Contact: Ms. Nicole Greer, 5034-A Thoroughbred Lane, Brentwood, TN 37027 USA; (615) 324-2362 (tel); [info@marcesociety.com](mailto:info@marcesociety.com) (email); [www.marcesociety.com](http://www.marcesociety.com) (web site).

**October 3–7**, Joint Meeting of the Southern Psychiatric Association; Maryland Psychiatric Society; and West Virginia Psychiatric Society, White Sulphur Springs, West Virginia (The Greenbrier). Contact: Susan Proctor, (410) 938-3403; [www.sopsych.org](http://www.sopsych.org) (web site).

**October 4–7**, 64th Institute on Psychiatric Services, American Psychiatric Association, New York, NY. Contact: Jill Gruber, APA Annual Meetings Dept., 1000 Wilson Blvd., Ste. 1825, Arlington, VA 22209; (703) 907-7815.

**October 25–28**, 43rd Annual Meeting, American Academy of Psychia-

try and the Law, Le Centre Sheraton, Montreal, PQ, Canada. Contact: (800) 331-1389 (tel); [www.aapl.org](http://www.aapl.org) (web site).

---

## NOVEMBER

**November 1–December 3**, Poster submissions open for Student/Resident, New Research, and Young Investigator categories, for May 2012 Annual Meeting of the American Psychiatric Association.

---

## DECEMBER

**December 6–9**, 23rd Annual Meeting and Symposium, American Academy of Addiction Psychiatry, Turnberry Isle Hotel Miami, Aventura, Florida. Contact: Isabel Vieira, 400 Massasoit Ave, Suite 307 (2nd floor), East Providence, RI 02914; (401) 524-3076 (tel); [www.aap.org/meetings-and-events](http://www.aap.org/meetings-and-events) (web site).

---

## FEBRUARY 2013

**February 13-17**, 18th Annual Psychopharmacology Update, Nevada Psychiatric Association (district branch of APA), Paris Las Vegas Ho-

tel, Las Vegas, NV. Contact: (877) 493-0007 (tel); [conference@nvpsychiatry.org](mailto:conference@nvpsychiatry.org) (email); [www.nvpsychiatry.org](http://www.nvpsychiatry.org) (web site).

---

## MAY 2013

**May 18–22**, 166th Annual Meeting, American Psychiatric Association, San Francisco, Calif. Contact: APA Annual Meetings Dept., 1000 Wilson Blvd, Suite 1825, Arlington, VA 22209; (703) 907-7815 (tel); <http://www.psych.org/learn/annual-meeting> (web site).

---

## JUNE 2013

**June 6–9**, 4th World Congress on ADHD: From Childhood to Adult Disease, Milan, Italy. Contact: Congress Organizer, +49-40-670 88 20 (tel); [adhd2013@cpo-hanser.de](mailto:adhd2013@cpo-hanser.de) (email); [www.adhd-congress.org](http://www.adhd-congress.org) (web site).

---

## JULY 2014

**July 8–13**, 28th International Congress of Applied Psychology, Palais des Congrès de Paris, France. Contact: [exh@icap2014.com](mailto:exh@icap2014.com) (email); [www.icap2014.com](http://www.icap2014.com) (web site).

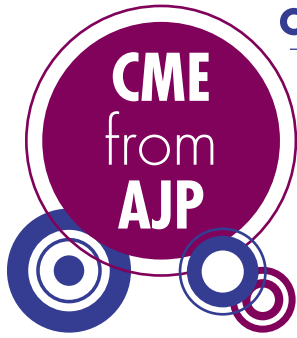

## Continuing Medical Education

Three articles in this issue form the basis of a short course with questions that can be answered for up to 1 *AMA PRA Category 1 Credit™* each by visiting <http://psychiatryonline.org/cme.aspx> and clicking on the “American Journal of Psychiatry” tab.

CME credit is issued only online, and a paid subscription to the AJP CME course program is required.

This month's courses appear on pages 1123–1126.

FREE AUDIO!

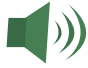

## Have You Heard?

You can listen to highlights of *The American Journal of Psychiatry* by downloading a monthly free .mp3 audio file from our web site (<http://ajp.psychiatryonline.org/audio.aspx#>) or by subscribing to the AJP Audio podcast at iTunes or other feed reader. Presented by Deputy Editor Dr. Susan Schultz or by Executive Editor Michael Roy, each month's audio lasts approximately 30 minutes and covers several research articles, the Treatment in Psychiatry feature, and one or two editorials.

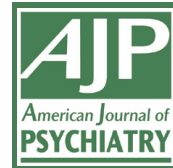

Coming in the November 2012 issue\*

## THE AMERICAN JOURNAL OF PSYCHIATRY

### Psychiatric Disorders in Preschoolers: Continuity From Ages 3 to 6

S.J. Bufferd, L.R. Dougherty, G.A. Carlson, S. Rose, and D.N. Klein

### Psychopathology in Adolescent Offspring of Parents With Panic Disorder, Major Depression, or Both: A 10-Year Follow-Up

D.R. Hirshfeld-Becker, J.A. Micco, A. Henin, C. Petty, S.V. Faraone, H. Mazursky, L. Bruett, J.F. Rosenbaum, and J. Biederman

### Treatment Course With Antidepressant Therapy in Late-Life Depression

Y.I. Sheline, B.M. Disabato, J. Hranilovich, C. Morris, G. D'Angelo, C. Pieper, T. Toffanin, W.D. Taylor, J.R. MacFall, C. Wilkins, D.M. Barch, K.A. Welsh-Bohmer, D.C. Steffens, R.R. Krishnan, and P. Murali Doraiswamy

### Brain-Derived Neurotrophic Factor Signaling and Subgenual Anterior Cingulate Cortex Dysfunction in Major Depressive Disorder

A. Tripp, H. Oh, J.-P. Guilloux, K. Martinowich, D.A. Lewis, and E. Sibille

\*Can't wait? Visit [ajp.psychiatryonline.org/AJPInAdvance.aspx](http://ajp.psychiatryonline.org/AJPInAdvance.aspx) to see all articles uploaded in advance of print!

# The Residents' JOURNAL

The Residents' JOURNAL
a publication of  
The American Journal of Psychiatry

---

August 2012
Volume 7
Issue 8

Inside

- 2 **Be Our Guest**  
Monifa Seawell, M.D.
- 3 **The Importance of Assessing Cultural Perspectives and Using Cultural Formulation**  
Nicole Zuber, M.D.
- 6 **Destigmatizing Depression in Kenya**  
Billina R. Shaw, M.D.
- 7 **Suicide of Veterans: Awareness of a Growing Problem**  
Margaret W. Leung, M.D., M.P.H.  
David Hsu, M.D.
- 10 **Teaching Psychodynamic Psychotherapy to Competency**  
Kiyoko Ogoke, M.D.
- 12 **The Continuing Importance of Integrating Psychotherapy Education Throughout Psychiatry Residency Training: Reflections on a "Nontherapy" Case**  
Samuel J. Pullen, D.O.
- 14 **Expressed Emotion: Relationship to Relapse and Relevance to the Psychiatric Resident**  
Olga Leibin, M.D.  
Michael Ascher, M.D.
- 17 **The Role of Computational Neuroscience in Psychiatry**  
Mohamed Amr Sherif, M.D.
- 19 **Test Your Knowledge**
- 20 **Author Information**
- 20 **Upcoming Issue Themes**

*In This Issue*



The section theme of this issue of the *Residents' Journal* is "international health care acculturation." Nicole Zuber, M.D., discusses the importance of assessing cultural perspectives and the use of cultural formulations in clinical practice. Dr. Zuber elegantly presents data on demographic changes in the population and challenges minority populations face in accessing health care, as well as guidelines clinicians can use to better serve an increasingly diverse patient population. In a commentary, Billina R. Shaw, M.D., describes her experience working in Kenya to educate communities about depression in an effort to abolish the stigma surrounding this illness.

|                                             |                                                                                            |
|---------------------------------------------|--------------------------------------------------------------------------------------------|
| Editor-in-Chief<br>Monifa Seawell, M.D.     | Guest Section Editor<br>Nicole Zuber, M.D.                                                 |
| Senior Editor<br>Sarah M. Fayad, M.D.       | Editors Emeriti<br>Sarah B. Johnson, M.D.<br>Molly McVey, M.D.<br>Joseph M. Carimele, M.D. |
| Associate Editor<br>Arshya Vahabzadeh, M.D. | Staff Editor<br>Angela Moore                                                               |

The Residents' Journal accepts manuscripts authored by medical students, resident physicians, and fellows. To submit your paper, please visit the manuscript submission site at [mc.manuscriptcentral.com/appi-ajp](http://mc.manuscriptcentral.com/appi-ajp) and either create an account or use your existing account. For manuscript type, select "Residents." Then follow the instructions to upload your manuscript. Residents who are interested in participating as Guest Section Editors should e-mail the Residents' Journal Editor-in-Chief Monifa Seawell at [mseawell@med.wayne.edu](mailto:mseawell@med.wayne.edu).

See the September 2010 issue for details on the new peer review process.

The Residents' Journal is sent free-of-charge to all psychiatry residents. Anyone interested in being included on the distribution list should contact Angela Moore, the Residents' Journal staff editor at [ajp@psych.org](mailto:ajp@psych.org) with "Subscribe to Residents' Journal" in the subject line.

## Contents

- A9 Editorial Board  
A11 Highlights of this issue

## Editorials

- 169 **The price of a drink: the potential of alcohol minimum unit pricing as a public health measure in the UK**  
P. Rice and C. Drummond

- 171 **Care in the Community – poems by doctors**  
Raymond Miller

- 172 **Long-term consequences of mild traumatic brain injury**  
R. J. Rona

- 174 **The 'autoimmune' mind – extra**  
Shabbir Amanullah

- 175 **The role of the high-risk approach in suicide prevention**  
A. Pitman and E. Caine

- 178 **Where are the hypotheses when you need them?**  
T. Burns

## Review article

- 180 **Effect of exercise on depression severity in older people: systematic review and meta-analysis of randomised controlled trials**  
C. Bridle, K. Spanjers, S. Patel, N. M. Atherton and S. E. Lamb

## Papers

- 186 **Neuropsychological outcomes of mild traumatic brain injury, post-traumatic stress disorder and depression in Iraq-deployed US Army soldiers**  
J. J. Vasterling, K. Brailey, S. P. Proctor, R. Kane, T. Heeren and M. Franz

- 193 **Effects of home on the mental health of British forces serving in Iraq and Afghanistan**  
K. Mulligan, N. Jones, M. Davies, P. McAllister, N. T. Fear, S. Wessely and N. Greenberg

- 198 **Woyzeck by Georg Buchner – in 100 words**  
Iain McClure

- 199 **Childhood psychosocial adversity and adult cortisol patterns**  
C. Power, C. Thomas, L. Li and C. Hertzman

- 206 **So This is Death – poem**  
Bear Loveday Tyler

- 207 **Cigarette smoking as a risk factor for other substance misuse: 10-year study of individuals with and without attention-deficit hyperactivity disorder**  
J. Biederman, C. R. Petty, P. Hammerness, H. Batchelder and S. V. Faraone

- 215 **Symptomatic remission in psychosis and real-life functioning**  
M. Oorschot, T. Lataster, V. Thewissen, M. Lardinois, J. van Os, P. A. E. G. Delespaul and I. Myin-Germeys

- 221 **Antipsychotics in dementia: prevalence and quality of antipsychotic drug prescribing in UK mental health services**  
T. R. E. Barnes, S. Banerjee, N. Collins, A. Treloar, S. M. McIntyre and C. Paton

- 227 **Depressive symptoms and pragmatic rehabilitation for chronic fatigue syndrome**  
A. J. Wearden, G. Dunn, C. Dowrick and R. K. Morriss

- 233 **Impact of national policy initiatives on fatal and non-fatal self-harm after psychiatric hospital discharge: time series analysis**  
D. Gunnell, C. Metcalfe, D. While, K. Hawton, D. Ho, L. Appleby and N. Kapur

- 239 **Morale in the English mental health workforce: questionnaire survey**  
S. Johnson, D. P. J. Osborn, R. Araya, E. Wearn, M. Paul, M. Stafford, N. Wellman, F. Nolan, H. Killaspy, B. Lloyd-Evans, E. Anderson and S. J. Wood

## Columns

- 247 Correspondence  
248 Correction  
249 Book reviews  
250 Contents of *Advances in Psychiatric Treatment*  
251 Contents of the *American Journal of Psychiatry*  
252 From the Editor's desk

## Cover picture

Graham Foster (b.1970). *The Dogs of War* (1999). Acrylic on paper 36" x 24".

Graham Foster is a Bermudian painter and sculptor. He writes:

'In 1999 I was invited to exhibit some paintings inspired by *Dr Faustus* for the Thomas Mann Society at the University of Eichstaett in Germany. This novel chronicles the life of a brilliant composer Adrian Leverkühn who descends into a neuro-syphilitic madness and sells his soul to the devil in exchange for musical genius. I took my inspiration from his consequent Apocalyptic hallucinations, an allegory of the turmoil in pre-World War 2 Germany. *The Dogs of War* focuses on the instigators of the war Machine – Hitler's thugs, the Nationalists, arms dealers and crooked politicians drawing Germany towards sinister figures representing the chaos and destruction to follow.'

Another of Graham's pictures was featured on the cover of the July 2011 issue (vol. 199, no. 1). For more information on the artist please visit [www.grahamfoster.com](http://www.grahamfoster.com)

We are always looking for interesting and visually appealing images for the cover of the *Journal* and would welcome suggestions or pictures, which should be sent to Dr Allan Beveridge, British Journal of Psychiatry, 17 Belgrave Square, London SW1X 8PG, UK or [bjp@rcpsych.ac.uk](mailto:bjp@rcpsych.ac.uk).

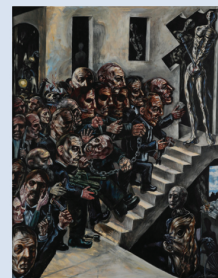

Source: https://ajp.psychiatryonline.org/doi/suppl/10.1176/ajp.2012.169.issue-10/suppl_file/front.pdf
