# THE AMERICAN JOURNAL OF PSYCHIATRY

## En este número

A10

### Perspectivas

#### Editoriales

- 1009** Sensibilidad y especificidad: criterios del DSM-IV versus criterios del DSM-5 para trastornos del espectro autista  
Luke Y. Tsai [Audio](#)
- 1012** ¿El uso concomitante de anti-inflamatorios no esteroideos (AINEs) reduce la efectividad de los antidepresivos?  
Richard C. Shelton
- 1016** Síntomas específicos inducidos por sustancias y vulnerabilidad general hacia la adicción  
Michael M. Vanyukov
- 1019** Desarrollo cerebral y esquizofrenia  
Robert Freedman

#### Discursos Presidenciales

- 1022** Discurso presidencial  
John M. Oldham
- 1027** Respuesta al discurso presidencial  
Dilip V. Jeste
- 1030** John M. Oldham, M.D., M.S.,  
138th Presidente, 2011–2012  
Robert Michels

#### Tratamiento en Psiquiatría

- 1031** El cambiante “panorama del peso” en la bulimia nervosa  
Cynthia M. Bulik, Marsha D. Marcus, Stephanie Zerwas, Michele D. Levine, y Maria La Via  
[Audio](#) [Guías clínicas](#) [EMC](#)

#### Imágenes en Psiquiatría

- 1037** El Centro de Salud Mental de Massachusetts: avanzando después de 100 años  
Carl Salzman, Larry J. Seidman, y Matcheri S. Keshavan

#### Resúmenes y Reseñas

- 1038** Hacia la neurociencia de sistemas del TDAH: Un metanálisis de 55 estudios de imágenes por resonancia magnética funcional (IRMf)  
Samuele Cortese, Clare Kelly, Camille Chabernaud, Erika Proal, Adriana Di Martino, Michael P. Milham, y F. Xavier Castellanos [Audio](#) [EMC](#)

## Nuevas investigaciones

### Artículos

- 1056** Aplicación de los criterios del DSM-5 para los trastornos del espectro autista a tres muestras de niños con diagnósticos del DSM-IV de trastornos generalizados del desarrollo  
Marisela Huerta, Somer L. Bishop, Amie Duncan, Vanessa Hus, y Catherine Lord [Audio](#) [Editorial](#)
- 1065** Respuesta a los antidepresivos en pacientes con depresión mayor expuestos a los anti-inflamatorios no esteroideos (AINEs): un estudio de farmacovigilancia  
Patience J. Gallagher, Victor Castro, Maurizio Fava, Jeffrey B. Weillburg, Shawn N. Murphy, Vivian S. Gainer, Susanne E. Churchill, Isaac S. Kohane, Dan V. Iosifescu, Jordan W. Smoller, y Roy H. Perlis  
[Audio](#) [Editorial](#) [EMC](#) [Guías clínicas](#)
- 1073** Disminución de la influencia genética en la presencia simultánea de síntomas de dependencia del alcohol, la marihuana y la nicotina entre los 14 y los 29 años  
Scott I. Vrieze, Brian M. Hicks, William G. Iacono, y Matt McGue [Editorial](#)
- 1082** Déficits en los reguladores transcripcionales de neuronas corticales “Parvalbumin” en esquizofrenia  
David W. Volk, Takurou Matsubara, Siyu Li, Elizabeth J. Sengupta, Danko Georgiev, Yoshio Minabe, Allan Sampson, Takanori Hashimoto, y David A. Lewis  
[Editorial](#)
- 1092** Desconectividad tálamo-cortical en esquizofrenia  
Neil D. Woodward, Haleh Karbasforoushan, y Stephan Heckers
- 1100** Hiperactividad del área motora pre suplementaria durante la inhibición de respuestas: un endofenotipo candidato del trastorno obsesivo-compulsivo  
Stella J. de Wit, Froukje E. de Vries, Ysbrand D. van der Werf, Danielle C. Cath, Dirk J. Heslenfeld, Eveline M. Veltman, Anton J.L.M. van Balkom, Dick J. Veltman, y Odile A. van den Heuvel [Audio](#)
- 1109** Respuesta de la amígdala al miedo preatentivo “enmascarado” en niños con problemas de conducta: el papel de rasgos de dureza e insensibilidad emocional  
Essi Viding, Catherine L. Sebastian, Mark R. Dadds, Patricia L. Lockwood, Charlotte A.M. Cecil, Stephane A. De Brito, y Eamon J. McCrory

## Comunicados y actualizaciones

### Cartas al Editor

- 1117** Edad en el momento de migrar y riesgo de esquizofrenia en inmigrantes en Dinamarca: un estudio de incidencia de 25 años  
Deficiencia de la razón de disparidad (odds ratio) para resultados comunes  
Investigación sobre la marihuana médica  
Anticuerpos IgG contra la subunidad NR1 del receptor NMDA en suero, no son detectados en la esquizofrenia

### Otros temas de interés

- 1123** Educación médica Continuada  
**A4** Directivos de la American Psychiatric Association  
**A6** Calendario  
**A9** Contenidos del *British Journal of Psychiatry*

## Cubierta

En este número, Huerta y colaboradores, evaluaron los criterios propuestos en el DSM-5 para la característica diagnóstica única de trastorno del espectro autista en niños con diagnósticos del DSM-IV de trastornos generalizados del desarrollo. Trabajo artístico (“Electric Kaffuffle”) de Mike O’Keefe de Ontario, Canadá. En su adolescencia, el Sr. O’Keefe dibujó una serie de casi 100 versiones de “Electric Kaffuffle” en eventos diferentes. Fotografía cortesía de los autores.

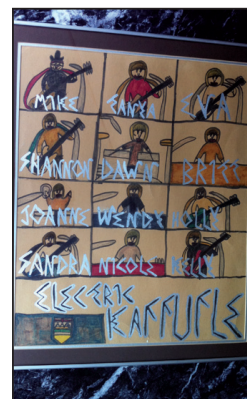

### Audio

artículo en AJP Audio: archivo .mp3 descargable de [ajp.psychiatryonline.org](http://ajp.psychiatryonline.org)

### Guías clínicas

este artículo ofrece guías clínicas (ver página “En este Número” o al final del artículo)

### EMC

existe un curso en línea que cubre los contenidos de este artículo para los suscriptores del programa de cursos de EMC del AJP

### Editorial

este artículo se discute en uno de los editoriales de este número

This issue’s Table of Contents is available in Spanish.  
Presented in collaboration with the Office of Global Health,  
UMDNJ-Robert Wood Johnson Medical School  
Translation courtesy of  
Sergi Casals, M.S.  
*Garuna Editors (www.garunaeditors.com), Barcelona, Spain*  
Carlos Lopez Jaramillo, M.D.  
*Universidad de Antioquia, Medellin, Colombia*  
and  
Javier I. Escobar, M.D., M.Sc.  
*UMDNJ-Robert Wood Johnson Medical School*  
Consulte *The American Journal of Psychiatry* en línea en  
[ajp.psychiatryonline.org](http://ajp.psychiatryonline.org)
